# Supplementary material
Source: publisher figshare collection journal article supplement (https://gsajournals.figshare.com/ndownloader/files/11461484)
Supplement: Supplementary file 1 [file 11461484]

## Sheet: Table Caption
Table S2. Pairwise comparisons of the freshwater-marine divergent regions defined by a Hidden Markov Model trained on continuous FSTʹ patterns. Listed are the total base pairs (bp) and proportions of the genome falling in the regions defined as “diverged” for each population group. The divergent genomic portion that overlaps is calculated for each pair of populations and the percent each pair or …

## Sheet: Divergence Overlap
	MiFW1	MFW2	MoSW	Cook Inlet	Group comparison	ratio of diverged bp and percent of genome diverged in common
MiFW1	0.2326
MiFW2	0.2212	0.2906
MoSW	0.2007	0.2201	0.2433
Cook Inlet	0.1515	0.1627	0.1595	0.1864
MiFW1	93223203
MiFW2	88668211	116463387
MoSW	80450299	88221045	97523272
Cook Inlet	60723546	65220336	63920463	74693711
Total number of bp diverged in common between population pairs
MiFW1	93223203
MiFW2	121018379	116463387
MoSW	110296176	125765614	97523272
Cook Inlet	107193368	125936762	108296520	74693711
Percentage of genome diverged in common between population pairs
MiFW1	0.2326
MiFW2	0.302	0.2906
MoSW	0.2752	0.3138	0.2433
Cook Inlet	0.2675	0.3142	0.2702	0.1864
Percentage of overlap of divergent regions between population pairs
MiFW1	1
MiFW2	0.7327	1
MoSW	0.7294	0.7015	1
Cook Inlet	0.5665	0.5179	0.5902	1
					MiFW1/MiFW2/MoSW	79673363/400788495 19.8792%
					MiFW1/MiFW2/Cook Inlet	59869967/400788495 14.938%
					MiFW1/MoSW/Cook Inlet	59666602/400788495 14.8873%
					MiFW2/MoSW/Cook Inlet	62285744/400788495 15.5408%
					MiFW1/MiFW2/MoSW/Cook In.	59149826/400788495 14.7584%
